# Supplementary material for: Propensity-score-matched evaluation of the incidence of radiation pneumonitis and secondary cancer risk for breast cancer patients treated with IMRT/VMAT
Source: PubMed Central journal article supplement (PMC5653804; doi:10.1038/s41598-017-14145-x), 2017-10-23
Supplement: 41598_2017_14145_MOESM1_ESM.pdf [file 41598_2017_14145_MOESM1_ESM.pdf]

**Propensity score-matched evaluation of the incidence of radiation pneumonitis and secondary cancer risk for breast cancer patients treated with IMRT/VMAT**

Pei-Ju Chao, PhD<sup>1,2</sup>, Hsiao-Fei Lee, MS<sup>1,2</sup>, Jen-Hong Lan, MS<sup>1,2</sup>, Shih-Sian Guo, MS<sup>1,2</sup>, Hui-Min Ting, PhD<sup>1,2</sup>, Yu-Jie Huang, MD PhD<sup>2</sup>, Hui-Chun Chen, MD<sup>2,\*</sup>, Tsair-Fwu Lee, PhD<sup>1,2,3,4,\*</sup>,

<sup>1</sup> Medical Physics and Informatics Laboratory of Electronics Engineering, National Kaohsiung University of Applied Sciences, Kaohsiung 80778, Taiwan, ROC

<sup>2</sup> Department of Radiation Oncology, Kaohsiung Chang Gung Memorial Hospital and Chang Gung University College of Medicine, Kaohsiung 83342, Taiwan, ROC

<sup>3</sup> Graduate Institute of Clinical Medicine, Kaohsiung Medical University, Kaohsiung 807, Taiwan, ROC

<sup>4</sup> Department of Radiation Oncology, Kaohsiung Yuan's General Hospital, Kaohsiung 80249, Taiwan, ROC.

## Supplementary

### Tables

Table S1. Initial candidate predictive factors for RP NTCP modeling.

| No. | Description      | Range or Classification | Median or frequency | <i>p</i> -value |
|-----|------------------|-------------------------|---------------------|-----------------|
| 1   | MD               | 8.75-26.34              | 14.99               | 0.009           |
| 2   | IV <sub>5</sub>  | 33.48-91.75             | 53.67               | 0.095           |
| 3   | IV <sub>10</sub> | 21.99-82.80             | 38.99               | 0.039           |
| 4   | IV <sub>13</sub> | 18.70-74.53             | 34.48               | 0.027           |
| 5   | IV <sub>15</sub> | 17.14-68.30             | 32.12               | 0.022           |
| 6   | IV <sub>20</sub> | 14.23-48.09             | 27.44               | 0.013           |
| 7   | IV <sub>25</sub> | 11.56-40.45             | 23.84               | 0.008           |
| 8   | IV <sub>30</sub> | 9.15-37.50              | 20.73               | 0.005           |
| 9   | IV <sub>40</sub> | 4.90-31.58              | 14.73               | 0.003           |
| 10  | IV <sub>50</sub> | 0.87-16.46              | 7.19                | 0.004           |

*Abbreviations:* MD, mean dose to the ipsilateral lung; IV<sub>5</sub> (the volume of the ipsilateral lung receiving at least 5 Gy; the following parameters are similar), IV<sub>10</sub>~IV<sub>50</sub>; *p*-value, univariate logistic test.

Table S2. Parameters used for Schneider's parameterization models

| Organs       | $\alpha$ | R    | $\beta$ | $\gamma_e$ | $\gamma_a$ |
|--------------|----------|------|---------|------------|------------|
| BS and SC    | 0.018    | 0.23 | 0.7     | -0.024     | 2.38       |
| Breast       | 0.044    | 0.15 | 8.2     | -0.037     | 1.70       |
| Lung (total) | 0.042    | 0.83 | 8.0     | 0.002      | 4.23       |
| Liver        | 0.323    | 0.29 | 2.4     | -0.021     | 3.60       |
| Stomach      | 0.460    | 0.46 | 5.2     | -0.002     | 1.90       |

*Abbreviation:* Note this  $\beta$  is used for EAR calculation only.  $\beta$  within the  $\alpha/\beta$  ratio is calculated from  $\alpha$  based on  $\alpha/\beta = 3$  Gy for all tissues. The EAR has units of excess cases per 10,000 person-years (PY)/Gy.

Table S3. Absorbed dose results for 6 OARs in patients treated with IMRT/VMAT

| No. | IMRT           |       |          |         |        |        |                      | VMAT      |       |          |         |        |        |                      |
|-----|----------------|-------|----------|---------|--------|--------|----------------------|-----------|-------|----------|---------|--------|--------|----------------------|
|     | Mean dose (Gy) |       |          |         |        |        | IV <sub>40</sub> (%) | Mean dose |       |          |         |        |        | IV <sub>40</sub> (%) |
|     | SC             | Liver | C-Breast | Stomach | C-Lung | I-Lung | I-Lung               | SC        | Liver | C-Breast | Stomach | C-Lung | I-Lung | I-Lung               |
| 1   | 0.18           | 0.44  | 0.90     | 5.31    | 0.64   | 12.22  | 12.54                | 0.46      | 1.45  | 1.41     | 0.72    | 2.52   | 9.82   | 16.48                |
| 2   | 0.19           | 0.65  | 0.59     | 4.30    | 0.29   | 13.21  | 14.79                | 0.46      | 1.45  | 1.41     | 0.72    | 0.92   | 9.82   | 9.47                 |
| 3   | 0.25           | 3.69  | 2.29     | 0.38    | 0.51   | 14.06  | 15.33                | 0.52      | 0.53  | 2.29     | 0.51    | 0.74   | 9.41   | 8.19                 |
| 4   | 0.25           | 1.22  | 3.79     | 0.88    | 2.64   | 14.75  | 15.51                | 0.86      | 2.13  | 2.68     | 2.77    | 2.74   | 8.75   | 4.90                 |
| 5   | 1.09           | 0.96  | 0.78     | 3.36    | 0.53   | 15.92  | 18.42                | 1.31      | 1.71  | 2.96     | 2.79    | 1.87   | 9.48   | 7.22                 |
| 6   | 0.23           | 3.05  | 1.11     | 0.19    | 0.36   | 16.16  | 18.07                | 0.97      | 0.84  | 2.97     | 0.76    | 1.06   | 10.19  | 7.21                 |
| 7   | 2.40           | 5.06  | 0.78     | 0.22    | 0.52   | 14.88  | 14.45                | 0.44      | 0.56  | 1.93     | 1.44    | 1.95   | 10.58  | 21.00                |
| 8   | 1.54           | 3.15  | 2.17     | 15.67   | 1.63   | 15.44  | 17.43                | 0.92      | 1.13  | 1.45     | 2.80    | 1.21   | 10.98  | 9.08                 |
| 9   | 1.59           | 7.36  | 2.46     | 0.83    | 0.83   | 13.91  | 20.65                | 0.63      | 1.23  | 1.79     | 0.22    | 2.07   | 12.56  | 14.32                |
| 10  | 1.02           | 3.59  | 2.31     | 0.76    | 0.73   | 17.05  | 18.77                | 0.87      | 1.35  | 2.74     | 0.88    | 1.12   | 12.19  | 12.01                |
| 11  | 1.81           | 3.80  | 9.23     | 2.39    | 3.01   | 14.67  | 13.98                | 1.31      | 2.97  | 2.07     | 0.72    | 1.18   | 10.85  | 8.80                 |
| 12  | 1.21           | 3.08  | 1.41     | 14.72   | 0.86   | 18.00  | 13.55                | 1.28      | 4.10  | 2.13     | 1.16    | 1.27   | 11.53  | 10.63                |
| 13  | 1.16           | 4.91  | 2.17     | 4.19    | 0.56   | 17.06  | 17.89                | 0.95      | 1.94  | 2.14     | 0.66    | 1.75   | 11.97  | 10.68                |
| 14  | 0.41           | 2.03  | 1.54     | 0.25    | 0.44   | 17.62  | 20.74                | 0.88      | 0.44  | 3.20     | 0.84    | 1.33   | 10.92  | 7.63                 |
| 15  | 0.35           | 2.30  | 1.39     | 4.90    | 0.59   | 17.35  | 20.07                | 1.00      | 1.25  | 5.20     | 0.70    | 1.40   | 12.08  | 9.93                 |
| 16  | 0.45           | 1.96  | 1.52     | 2.00    | 2.82   | 18.32  | 22.68                | 1.86      | 2.24  | 2.34     | 2.18    | 1.69   | 12.56  | 11.79                |
| 17  | 1.46           | 13.61 | 2.20     | 2.38    | 1.06   | 17.18  | 19.37                | 2.14      | 0.78  | 0.86     | 1.07    | 1.90   | 10.71  | 5.34                 |
| 18  | 1.61           | 9.24  | 5.93     | 2.68    | 1.36   | 16.17  | 16.04                | 0.49      | 0.96  | 1.26     | 3.71    | 1.13   | 15.41  | 8.33                 |
| 19  | 0.90           | 6.90  | 3.24     | 0.78    | 1.80   | 16.58  | 17.36                | 7.79      | 3.15  | 2.84     | 0.55    | 2.88   | 13.95  | 13.13                |
| 0   | 0.31           | 9.20  | 1.26     | 0.26    | 0.30   | 18.81  | 19.97                | 3.66      | 1.58  | 5.16     | 0.46    | 2.38   | 13.93  | 13.75                |
| 21  | 2.82           | 0.68  | 0.59     | 2.13    | 0.79   | 17.30  | 12.74                | 1.26      | 3.95  | 6.92     | 2.06    | 3.87   | 12.56  | 8.63                 |
| 22  | 1.85           | 2.77  | 2.06     | 7.63    | 1.07   | 17.78  | 18.42                | 0.99      | 0.92  | 2.18     | 4.65    | 1.31   | 12.13  | 11.64                |
| 23  | 1.60           | 10.28 | 1.97     | 0.77    | 0.56   | 18.58  | 20.49                | 0.99      | 0.92  | 2.18     | 4.65    | 1.11   | 12.13  | 8.24                 |
| 24  | 1.71           | 0.78  | 2.73     | 2.35    | 1.08   | 18.33  | 19.20                | 0.85      | 3.18  | 1.25     | 0.76    | 1.01   | 12.50  | 8.91                 |
| 25  | 4.19           | 0.50  | 1.76     | 3.33    | 0.93   | 20.97  | 24.28                | 5.22      | 1.11  | 3.21     | 0.62    | 2.78   | 13.69  | 13.17                |
| 26  | 1.91           | 11.48 | 5.03     | 1.09    | 1.40   | 16.55  | 11.30                | 0.92      | 1.94  | 1.61     | 11.79   | 1.01   | 11.98  | 7.16                 |
| 27  | 1.68           | 3.85  | 4.11     | 13.13   | 2.05   | 19.46  | 20.33                | 1.65      | 9.96  | 2.21     | 1.43    | 1.50   | 13.50  | 9.08                 |
| 28  | 2.12           | 2.50  | 1.70     | 9.61    | 1.04   | 20.20  | 23.13                | 2.94      | 5.81  | 2.13     | 0.40    | 1.08   | 17.24  | 17.13                |
| 29  | 2.24           | 1.94  | 2.03     | 11.18   | 1.96   | 26.34  | 31.58                | 4.21      | 1.60  | 2.15     | 1.53    | 2.65   | 16.43  | 15.43                |
| 30  | 0.92           | 6.14  | 2.66     | 0.61    | 0.97   | 24.81  | 22.31                | 2.51      | 2.18  | 4.30     | 4.06    | 2.00   | 16.77  | 15.63                |

*Abbreviations:* OED, organ equivalent doses; IMRT, intensity-modulated radiotherapy; VMAT, volumetric-modulated arc therapy; C-Breast, contralateral breast; I-Lung, ipsilateral lung; C-Lung, contralateral lung.

Table S4. OED results for patients treated with IMRT/VMAT

| No. | IMRT - OED (Gy) |       |          |         |        |        | VMAT - OED (Gy) |       |          |         |        |        |
|-----|-----------------|-------|----------|---------|--------|--------|-----------------|-------|----------|---------|--------|--------|
|     | SC              | Liver | C-Breast | Stomach | I-Lung | C-Lung | SC              | Liver | C-Breast | Stomach | I-Lung | C-Lung |
| 1   | 0.18            | 0.28  | 0.77     | 0.49    | 4.85   | 0.64   | 0.60            | 0.63  | 1.64     | 0.53    | 4.03   | 2.52   |
| 2   | 0.19            | 0.29  | 0.54     | 0.56    | 5.03   | 0.29   | 0.45            | 0.60  | 1.27     | 0.48    | 4.11   | 0.92   |
| 3   | 0.25            | 0.75  | 1.18     | 0.31    | 5.49   | 0.51   | 0.51            | 0.38  | 1.74     | 0.38    | 4.21   | 0.74   |
| 4   | 0.25            | 0.44  | 2.12     | 0.49    | 5.85   | 2.64   | 0.85            | 0.84  | 2.16     | 0.83    | 4.54   | 2.74   |
| 5   | 1.05            | 0.35  | 0.68     | 0.79    | 5.92   | 0.53   | 1.27            | 0.52  | 2.08     | 0.63    | 4.76   | 1.87   |
| 6   | 0.23            | 0.62  | 0.81     | 0.17    | 5.96   | 0.36   | 0.95            | 0.51  | 2.31     | 0.41    | 4.83   | 1.06   |
| 7   | 2.11            | 0.72  | 0.66     | 0.19    | 6.01   | 0.52   | 0.43            | 0.39  | 1.56     | 0.57    | 4.86   | 1.95   |
| 8   | 1.48            | 0.99  | 1.87     | 0.87    | 6.20   | 1.63   | 0.89            | 0.57  | 1.30     | 0.66    | 4.98   | 1.21   |
| 9   | 1.52            | 0.94  | 2.01     | 0.47    | 6.24   | 0.83   | 0.62            | 0.40  | 1.51     | 0.19    | 5.01   | 2.07   |
| 10  | 0.98            | 0.73  | 1.94     | 0.45    | 6.26   | 0.73   | 0.85            | 0.57  | 2.23     | 0.34    | 5.02   | 1.12   |
| 11  | 1.72            | 0.81  | 1.62     | 0.77    | 6.35   | 3.01   | 1.27            | 0.76  | 1.73     | 0.47    | 5.06   | 1.18   |
| 12  | 1.14            | 0.47  | 1.14     | 0.79    | 6.41   | 0.86   | 1.25            | 0.89  | 1.83     | 0.62    | 5.08   | 1.27   |
| 13  | 1.15            | 0.67  | 1.44     | 0.62    | 6.47   | 0.56   | 0.93            | 0.55  | 1.73     | 0.40    | 5.31   | 1.75   |
| 14  | 0.41            | 0.61  | 0.85     | 0.22    | 6.49   | 0.44   | 0.86            | 0.35  | 2.44     | 0.52    | 5.39   | 1.33   |
| 15  | 0.35            | 0.41  | 1.03     | 0.64    | 6.51   | 0.59   | 0.98            | 0.62  | 2.87     | 0.46    | 5.44   | 1.40   |
| 16  | 0.44            | 0.60  | 1.29     | 0.72    | 6.57   | 2.82   | 1.62            | 0.66  | 1.77     | 0.58    | 5.48   | 1.69   |
| 17  | 1.39            | 0.93  | 1.86     | 0.87    | 6.60   | 1.06   | 2.00            | 0.53  | 2.82     | 0.58    | 5.73   | 1.90   |
| 18  | 1.53            | 0.93  | 1.89     | 0.82    | 6.66   | 1.36   | 0.49            | 0.60  | 1.12     | 0.64    | 5.73   | 1.13   |
| 19  | 0.88            | 0.84  | 2.24     | 0.53    | 6.67   | 1.80   | 6.39            | 0.81  | 2.40     | 0.40    | 5.74   | 2.88   |
| 20  | 0.31            | 0.80  | 1.00     | 0.22    | 6.69   | 0.30   | 3.25            | 0.61  | 3.33     | 0.35    | 5.80   | 2.38   |
| 21  | 2.37            | 0.34  | 0.51     | 0.78    | 6.96   | 0.79   | 1.22            | 0.71  | 4.57     | 0.70    | 5.87   | 3.87   |
| 22  | 1.74            | 0.53  | 1.19     | 0.85    | 7.08   | 1.07   | 0.97            | 0.55  | 1.84     | 0.72    | 5.89   | 1.31   |
| 23  | 1.50            | 0.92  | 1.57     | 0.46    | 7.18   | 0.56   | 0.97            | 0.55  | 1.84     | 0.72    | 5.89   | 1.11   |
| 24  | 1.61            | 0.47  | 2.20     | 0.76    | 7.19   | 1.08   | 0.83            | 0.95  | 1.16     | 0.53    | 5.89   | 1.01   |
| 25  | 3.44            | 0.30  | 1.28     | 0.80    | 7.20   | 0.93   | 4.41            | 0.62  | 2.45     | 0.43    | 5.92   | 2.78   |
| 26  | 1.82            | 0.92  | 2.96     | 0.50    | 7.22   | 1.40   | 0.90            | 0.74  | 1.44     | 0.89    | 5.94   | 1.01   |
| 27  | 1.61            | 0.93  | 2.79     | 0.76    | 7.55   | 2.05   | 1.60            | 0.98  | 1.91     | 0.77    | 6.49   | 1.50   |
| 28  | 2.03            | 0.52  | 1.30     | 0.86    | 7.81   | 1.04   | 2.65            | 0.86  | 1.41     | 0.33    | 6.77   | 1.08   |
| 29  | 2.03            | 0.58  | 1.67     | 0.82    | 9.21   | 1.96   | 3.79            | 0.79  | 1.79     | 0.67    | 6.81   | 2.65   |
| 30  | 0.90            | 0.76  | 2.14     | 0.40    | 9.73   | 0.97   | 2.36            | 0.79  | 2.61     | 0.81    | 7.01   | 2.00   |

*Abbreviation:* OED, organ equivalent doses; IMRT, intensity modulated radiotherapy; VMAT, volumetric modulated arc therapy; C-Breast, contralateral breast; I-Lung, ipsilateral lung; C-Lung, contralateral lung.

Table S5. EAR results for patients treated with IMRT/VMAT

| No. | IMRT (EAR/10000 PY) |       |          |         |        |        | VMAT (EAR/10000 PY) |       |          |         |        |        |
|-----|---------------------|-------|----------|---------|--------|--------|---------------------|-------|----------|---------|--------|--------|
|     | SC                  | Liver | C-Breast | Stomach | I-Lung | C-Lung | SC                  | Liver | C-Breast | Stomach | I-Lung | C-Lung |
| 1   | 0.09                | 0.49  | 3.47     | 2.49    | 40.03  | 4.63   | 0.25                | 1.17  | 7.19     | 2.46    | 33.55  | 20.57  |
| 2   | 0.06                | 0.36  | 1.40     | 2.72    | 42.85  | 2.47   | 0.19                | 0.91  | 4.61     | 2.41    | 34.36  | 7.69   |
| 3   | 0.09                | 0.95  | 3.18     | 1.53    | 46.65  | 4.33   | 0.23                | 0.62  | 7.07     | 1.89    | 34.96  | 6.15   |
| 4   | 0.09                | 0.59  | 6.17     | 2.42    | 49.45  | 22.34  | 0.35                | 1.27  | 7.83     | 4.14    | 37.94  | 22.59  |
| 5   | 0.37                | 0.46  | 1.97     | 3.90    | 50.09  | 4.99   | 0.56                | 0.84  | 8.43     | 3.14    | 39.60  | 15.54  |
| 6   | 0.11                | 1.03  | 3.56     | 0.86    | 49.29  | 2.98   | 0.38                | 0.75  | 8.09     | 2.05    | 40.46  | 8.88   |
| 7   | 0.85                | 1.06  | 2.32     | 0.96    | 50.36  | 4.36   | 0.15                | 0.49  | 4.20     | 2.78    | 41.27  | 16.56  |
| 8   | 0.74                | 1.78  | 9.14     | 4.42    | 51.00  | 13.41  | 0.58                | 1.29  | 9.54     | 3.44    | 40.08  | 9.74   |
| 9   | 0.58                | 1.33  | 6.55     | 2.32    | 52.47  | 7.09   | 0.26                | 0.61  | 5.67     | 0.95    | 41.83  | 17.27  |
| 10  | 0.72                | 1.82  | 17.16    | 2.37    | 49.85  | 5.82   | 0.35                | 0.86  | 8.10     | 1.71    | 41.93  | 9.36   |
| 11  | 0.70                | 1.20  | 12.66    | 3.84    | 53.23  | 25.21  | 0.58                | 1.25  | 7.29     | 2.36    | 42.00  | 9.79   |
| 12  | 0.36                | 0.57  | 2.76     | 3.87    | 54.82  | 7.12   | 0.67                | 1.70  | 9.98     | 3.16    | 41.51  | 10.39  |
| 13  | 0.46                | 1.02  | 3.27     | 2.85    | 55.41  | 8.32   | 0.37                | 0.79  | 5.85     | 1.99    | 44.53  | 14.69  |
| 14  | 0.17                | 0.93  | 3.09     | 1.09    | 54.28  | 3.68   | 0.43                | 0.63  | 11.90    | 2.63    | 44.30  | 10.94  |
| 15  | 0.17                | 0.71  | 4.85     | 3.23    | 53.63  | 4.86   | 0.51                | 1.16  | 15.10    | 2.34    | 44.58  | 11.47  |
| 16  | 0.14                | 0.72  | 3.12     | 3.49    | 56.16  | 24.10  | 0.69                | 1.05  | 7.01     | 2.81    | 45.74  | 14.13  |
| 17  | 0.56                | 1.38  | 6.52     | 4.30    | 55.32  | 8.88   | 0.98                | 0.92  | 3.88     | 2.95    | 47.20  | 15.66  |
| 18  | 0.59                | 1.31  | 12.64    | 4.07    | 55.98  | 11.44  | 0.20                | 0.91  | 4.08     | 3.19    | 47.91  | 9.45   |
| 19  | 0.41                | 1.42  | 9.79     | 2.68    | 55.17  | 14.99  | 2.18                | 1.03  | 6.47     | 1.94    | 48.77  | 24.46  |
| 20  | 0.17                | 1.52  | 5.45     | 1.12    | 54.70  | 2.45   | 1.06                | 0.75  | 8.37     | 1.71    | 49.50  | 20.30  |
| 21  | 0.89                | 0.48  | 1.61     | 3.87    | 58.69  | 6.64   | 0.67                | 1.38  | 25.89    | 3.55    | 47.87  | 31.59  |
| 22  | 0.67                | 0.76  | 3.89     | 4.18    | 59.56  | 9.00   | 0.31                | 0.67  | 4.62     | 3.52    | 50.24  | 11.17  |
| 23  | 0.59                | 1.34  | 5.30     | 2.26    | 60.25  | 4.70   | 0.47                | 0.95  | 8.66     | 3.64    | 48.56  | 9.15   |
| 24  | 0.72                | 0.75  | 8.95     | 3.79    | 59.76  | 8.97   | 0.52                | 2.06  | 7.90     | 2.71    | 47.62  | 8.16   |
| 25  | 1.89                | 0.59  | 7.24     | 4.06    | 58.74  | 7.59   | 1.78                | 0.92  | 8.57     | 2.14    | 49.61  | 23.29  |
| 26  | 0.64                | 1.20  | 8.29     | 2.43    | 61.18  | 11.87  | 0.53                | 1.52  | 9.09     | 4.57    | 48.16  | 8.19   |
| 27  | 0.59                | 1.26  | 8.42     | 3.75    | 63.78  | 17.31  | 0.95                | 2.03  | 12.07    | 3.92    | 52.62  | 12.17  |
| 28  | 1.17                | 1.05  | 7.92     | 4.41    | 63.53  | 8.45   | 0.92                | 1.12  | 3.95     | 1.62    | 57.37  | 9.10   |
| 29  | 0.76                | 0.81  | 5.22     | 4.05    | 77.60  | 16.52  | 1.32                | 1.03  | 5.02     | 3.29    | 57.70  | 22.47  |
| 30  | 0.30                | 0.95  | 5.56     | 1.95    | 82.82  | 8.26   | 0.87                | 1.08  | 7.87     | 3.98    | 59.16  | 16.89  |

*Abbreviation:* EAR, excess absolute risks; IMRT, intensity modulated radiotherapy; VMAT, volumetric modulated arc therapy; C-Breast, contralateral breast; I-Lung, ipsilateral lung; C-Lung, contralateral lung. The EAR has units of excess cases per 10,000 person-years (PY)/Gy.

Table S6. Difference comparison between IMRT and VMAT with OED and EAR

| Techniques<br>Organs | averaged OED (Gy) (30: 30) |      |          | averaged EAR (/10000 PY) (30: 30) |       |          |
|----------------------|----------------------------|------|----------|-----------------------------------|-------|----------|
|                      | IMRT                       | VMAT | <i>p</i> | IMRT                              | VMAT  | <i>P</i> |
| Spinal cord          | 1.22                       | 1.54 | 0.27     | 0.52                              | 0.64  | 0.28     |
| C-Breast             | 1.48                       | 2.03 | <0.01    | 6.05                              | 8.14  | 0.05     |
| I-Lung               | 6.68                       | 5.45 | <0.01    | 55.89                             | 45.36 | <0.01    |
| C-Lung               | 1.11                       | 1.71 | <0.01    | 9.43                              | 14.26 | <0.01    |
| Liver                | 0.65                       | 0.64 | 0.94     | 0.99                              | 1.06  | 0.53     |
| Stomach              | 0.60                       | 0.55 | 0.38     | 2.98                              | 2.77  | 0.42     |

*Abbreviations:* IMRT, intensity-modulated radiotherapy; VMAT, volumetric-modulated arc therapy; OED, organ equivalent doses; EAR, excess absolute risks; C-Breast, contralateral breast; I-Lung, ipsilateral lung; C-Lung, contralateral lung. The EAR has units of excess cases per 10,000 person-years (PY)/Gy.

## Supplementary

## Figures

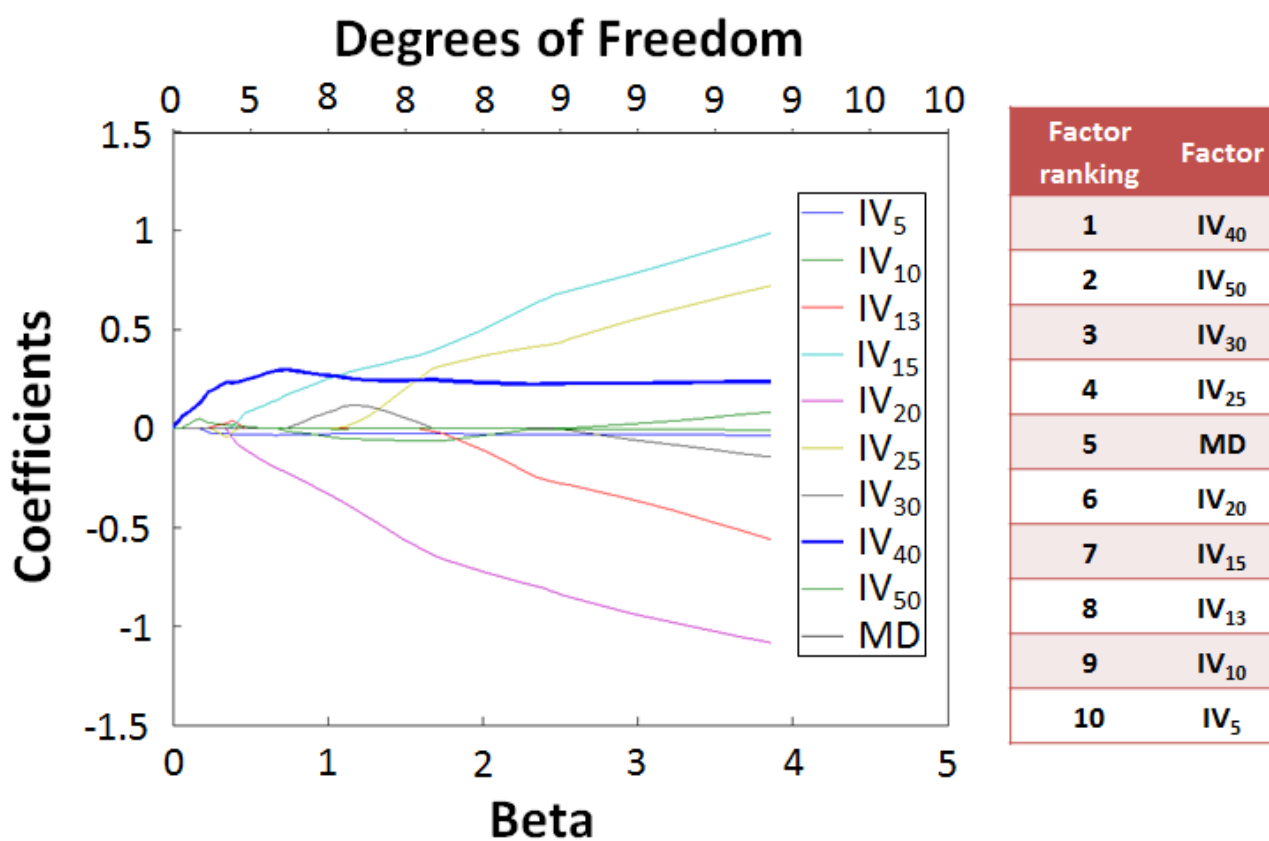

Figure S1: The LASSO trace plot of dosimetric candidate predictive factors and the factors ranking list.

*Abbreviations:* IV<sub>40</sub>: the volume of the ipsilateral lung receiving at least 40 Gy; the following parameters are similar; IV<sub>5</sub>~IV<sub>50</sub>; LASSO: least absolute shrinkage and selection operator.

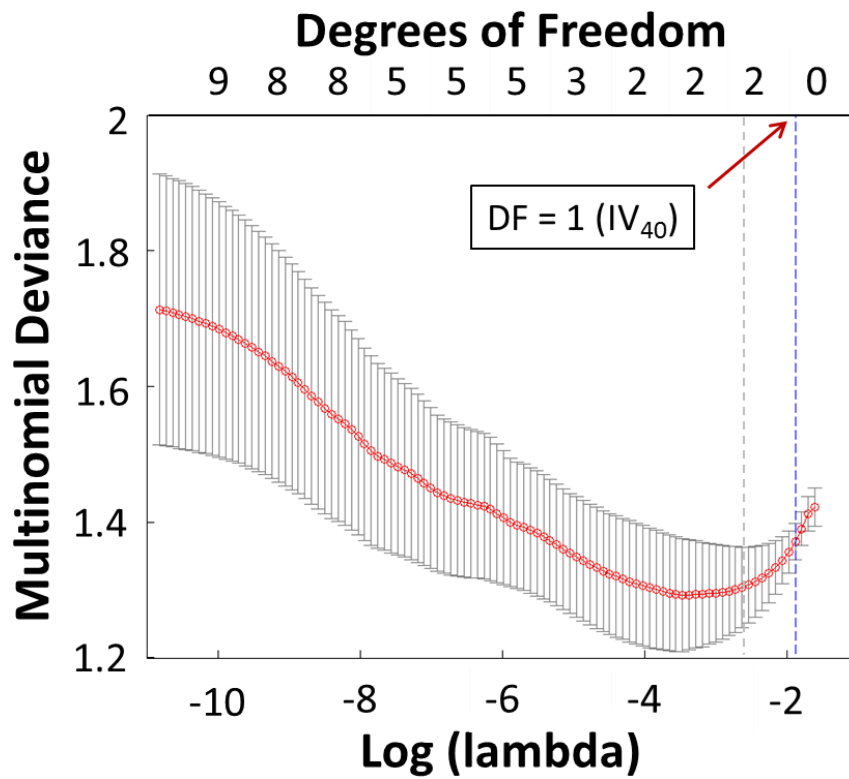

Figure S2: The cross-validated mean squared error (MSE) of the LASSOGLM fit.  $IV_{40}$  was selected as the dominant risk factor for the RP NTCP model by LASSO using cross-validation.

*Abbreviations:* LASSO, least absolute shrinkage and selection operator; RP, radiation-induced pneumonitis; NTCP, normal tissue complication probability;  $IV_{40}$ : the volume of the ipsilateral lung receiving at least 40 Gy;
